# Supplementary material
Source: PubMed Central journal article supplement (PMC3082863)
Supplement: 97320630006086S1.pdf [file 97320630006086S1.pdf]

## Supplementary material:

**Table 1:** Japanese availability in the i2b2 workbench and the i2b2 web client

| Module name   | Facility                | Language availability in i2b2 Workbench |          | Language availability in i2b2 Web Client |          |
|---------------|-------------------------|-----------------------------------------|----------|------------------------------------------|----------|
|               |                         | English                                 | Japanese | English                                  | Japanese |
| Navigate      | Ontology browse         | OK                                      | OK       | OK                                       | OK       |
| Terms         | (Browse hierarchy)      |                                         |          |                                          |          |
| Find Terms    | Ontology search         | OK                                      | OK       | OK                                       | OK       |
|               | (Keyword search)        |                                         |          |                                          |          |
| Query Tool    | Query builder           | OK                                      | NA       | OK                                       | OK       |
| Previous      | Past query history      | OK                                      | OK       | OK                                       | OK       |
| Queries       |                         |                                         |          |                                          |          |
| Timeline View | View of time course     | OK                                      | OK       | OK                                       | OK       |
|               | series of events        |                                         |          |                                          |          |
| Workplace     | Sharing query histories | OK                                      | NA       | OK                                       | OK       |
|               | between users           |                                         |          |                                          |          |
| Import Data   | Data registration       | OK                                      | NA       | NI                                       | NI       |
| Export Data   | Data export             | OK                                      | NA       | NI                                       | NI       |
|               | (Statistical analysis)  |                                         |          |                                          |          |

We obtained these results with the i2b2 workbench and the web client of ver.1.4; OK: The facility is available with data in Japanese; NA: The facility is not available with data in Japanese; NI: The facility is not implemented.
